# Supplementary material for: Nondestructive Identification of Rare Trophoblastic Cells by Endoplasmic Reticulum Staining for Noninvasive Prenatal Testing of Monogenic Diseases
Source: PubMed Central journal article supplement (PMC7141004; doi:10.1002/advs.201903354), 2020-02-13
Supplement: ADVS-7-1903354-s001.pdf [file ADVS-7-1903354-s001.pdf]

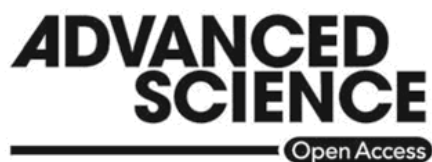

## Supporting Information

for *Adv. Sci.*, DOI: 10.1002/advs.201903354

Nondestructive Identification of Rare Trophoblastic Cells by Endoplasmic Reticulum Staining for Noninvasive Prenatal Testing of Monogenic Diseases

*Yifang Huang, Bo Situ, Liping Huang, Yingsi Cao, Hong Sui, Xinyi Ye, Xiujuan Jiang, Aifen Liang, Maliang Tao, Shihua Luo, Ye Zhang, Mei Zhong, and Lei Zheng\**

Copyright WILEY-VCH Verlag GmbH & Co. KGaA, 69469 Weinheim, Germany,

2020.

## Supporting Information

### **Nondestructive Identification of Rare Trophoblastic Cells by Endoplasmic Reticulum Staining for Noninvasive Prenatal Testing of Monogenic Diseases**

*Yifang Huang†, Bo Situ†, Liping Huang†, Yingsi Cao, Hong Sui, Xinyi Ye, Xiujian Jiang, Aifen Liang, Maliang Tao, Shihua Luo, Ye Zhang, Mei Zhong, Lei Zheng \**

Dr. Y. Huang, Dr. B. Situ, X. Ye, X. Jiang, M. Tao, S. Luo, Y. Zhang, Prof. L. Zheng  
Department of Laboratory Medicine, Nanfang Hospital, Southern Medical University,  
Guangzhou, 510515, China

E-mail: nfyzhenglei@smu.edu.cn

Dr. Y. Huang, Dr. B. Situ, X. Ye, X. Jiang, M. Tao, S. Luo, Y. Zhang, Prof. L. Zheng  
Guangdong Engineering and Technology Research Center for Rapid Diagnostic  
Biosensors,

Nanfang Hospital, Southern Medical University, Guangzhou 510515, China

Dr. L. Huang, Y. Cao, Prof. M. Zhong

Department of Obstetrics and Gynecology, Nanfang Hospital, Southern Medical  
University, Guangzhou 510515, PR China.

Dr. H. Sui, A. Liang

Department of Laboratory Medicine, Dongguan Kanghua Hospital, Dongguan 523080,  
PR China.

† These authors contributed equally to this work.

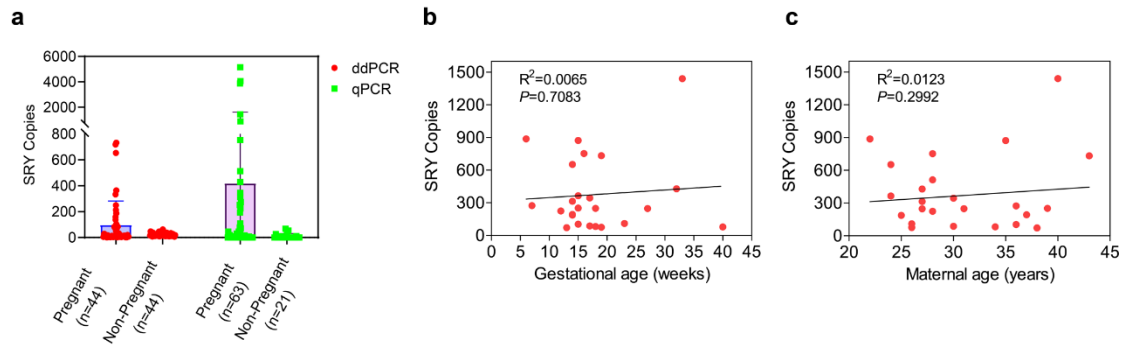

**Figure S1.** Y chromosome of fetal cells detected by ddPCR and qPCR. a) The number of fetal cells evaluated by ddPCR and qPCR via detection of the copy number of *SRY* in Pap samples from 107 pregnancies and 65 non-pregnant women. Ten of 44 samples from pregnant women in ddPCR (an average of 277 copies) and 20 of 63 in qPCR (an average of 1310 copies) show *SRY* positivity. The copy number of *SRY* is correlated to maternal age b) and gestational age c) using linear regression (the outliers are excluded). No significant correlation is observed.

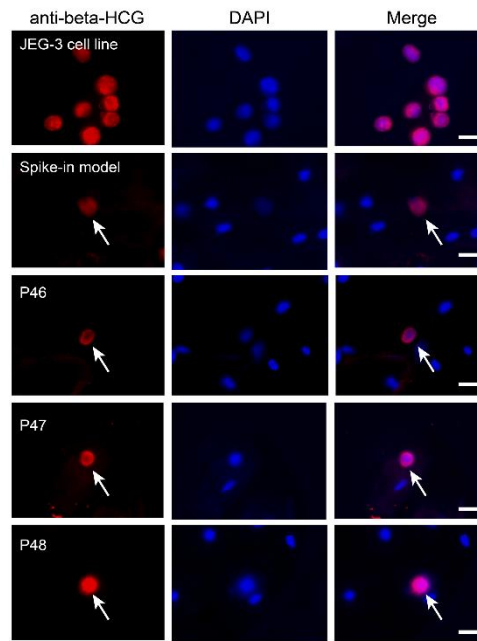

**Figure S2.** Immunostaining of trophoblastic cells in Pap samples. Representative

images of  $\beta$ -hCG staining for trophoblastic cells in three Pap samples are shown. The white arrow indicates the representative cells positive for  $\beta$ -hCG. Scale bar, 20 $\mu$ m.

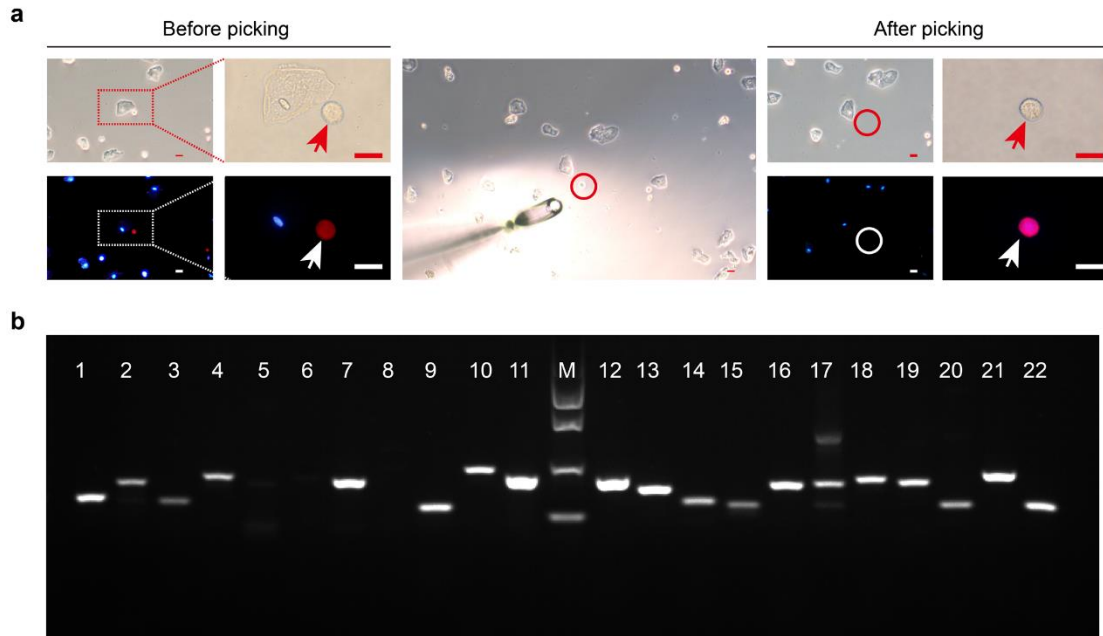

**Figure S3.** The process of single-cell isolation and the genomic coverage of WGA product. a) The process of single-cell isolation. Target cells are manual isolated by a micropipette. b) The genomic coverage of WGA product assessed by 22 genomic loci. 19 of 22 loci are detected in P26.

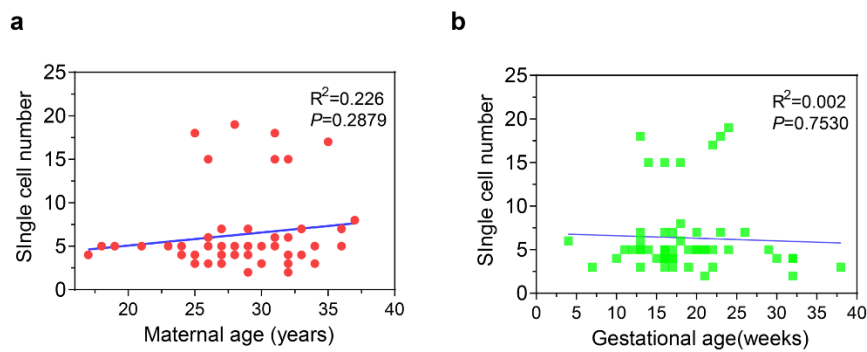

**Figure S4.** Correlating the number of rare trophoblastic cells and maternal age,

gestational weeks. Significant correlation is not observed in maternal age a) and gestational weeks b).

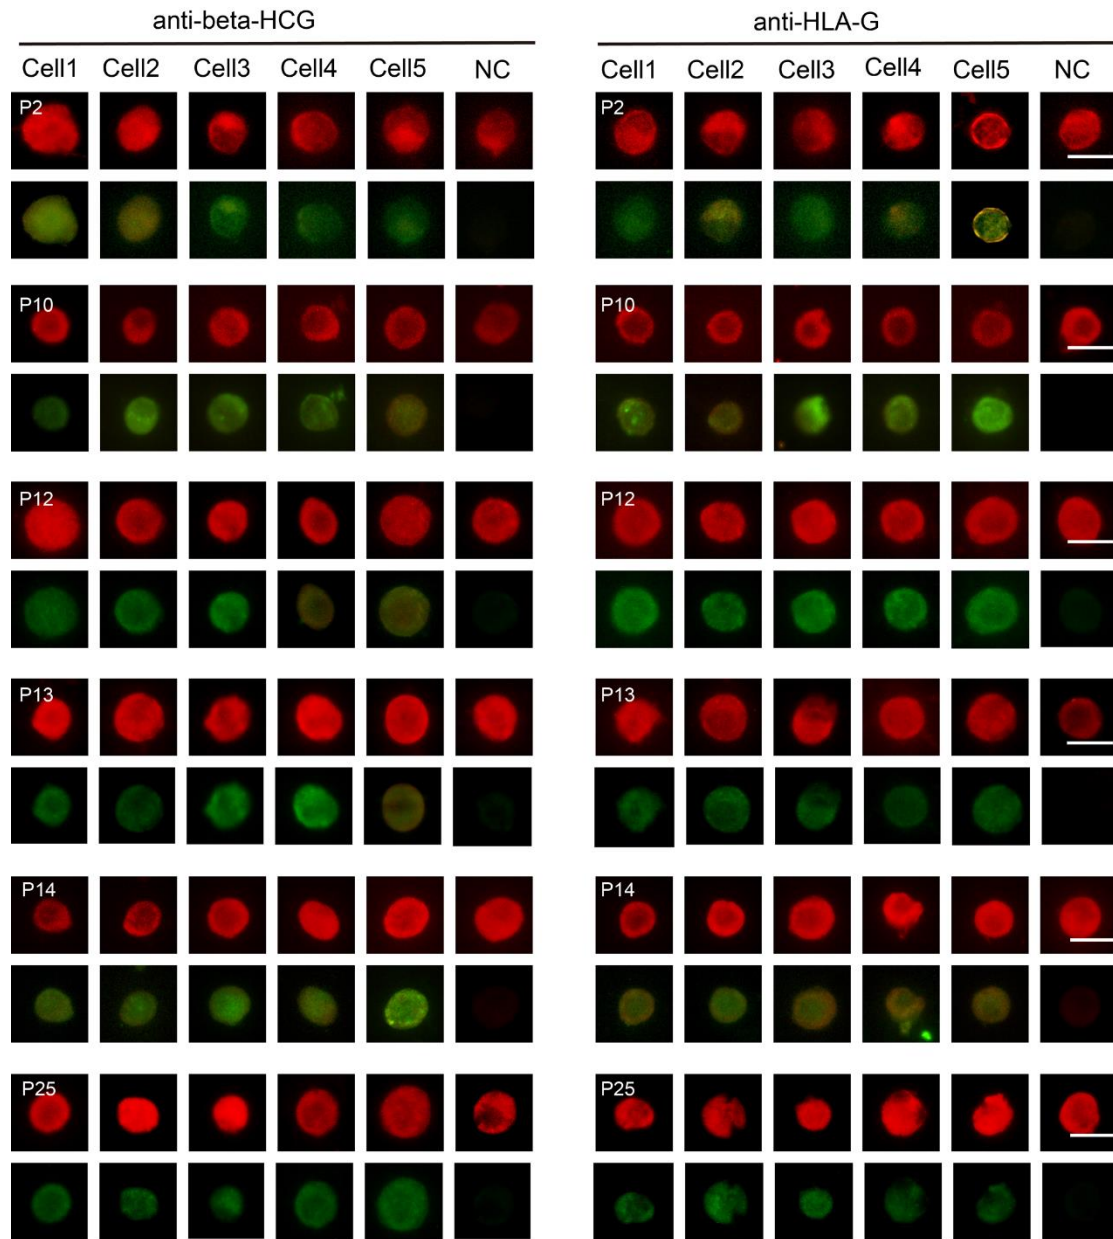

**Figure S5.** ER<sup>high</sup> single cells analyzed by immunostaining. Twelve single trophoblastic cells are picked from each sample, five cells are stained with  $\beta$ -hCG (FITC, Green) and five stained with HLA-G (FITC, Green), two cells are used for

negative control (NC); ER-Tracker is shown in red. Scale bar, 20µm.

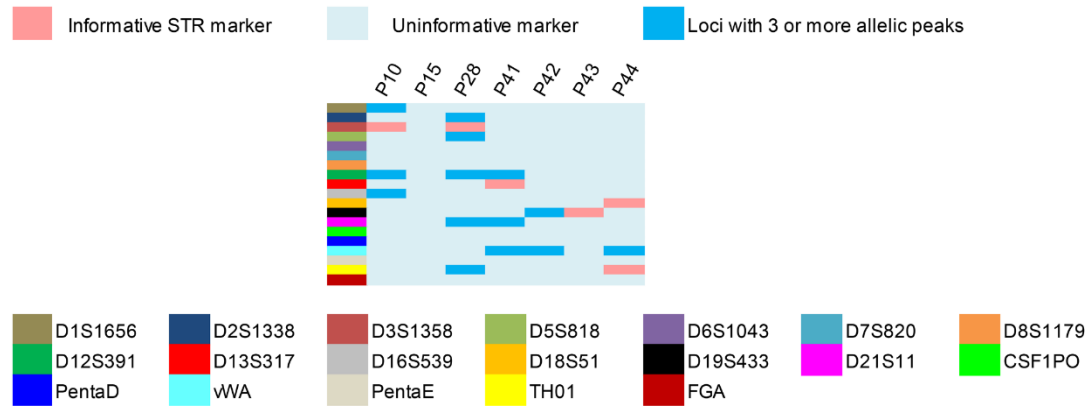

**Figure S6.** Cells with low LDA predictive probability and cells sorted by flow cell sorting assessed by STR. Cells with low LDA predictive probability in P10, P15, and P28 show maternal cell contamination in STR analysis. For flow cell sorting, 54, 69, 30 and 79 cells are separated in P41, P42, P43 and P44, respectively. These samples also show maternal cell contamination in STR analysis. The blue squares represent the loci with three or more allelic peaks.

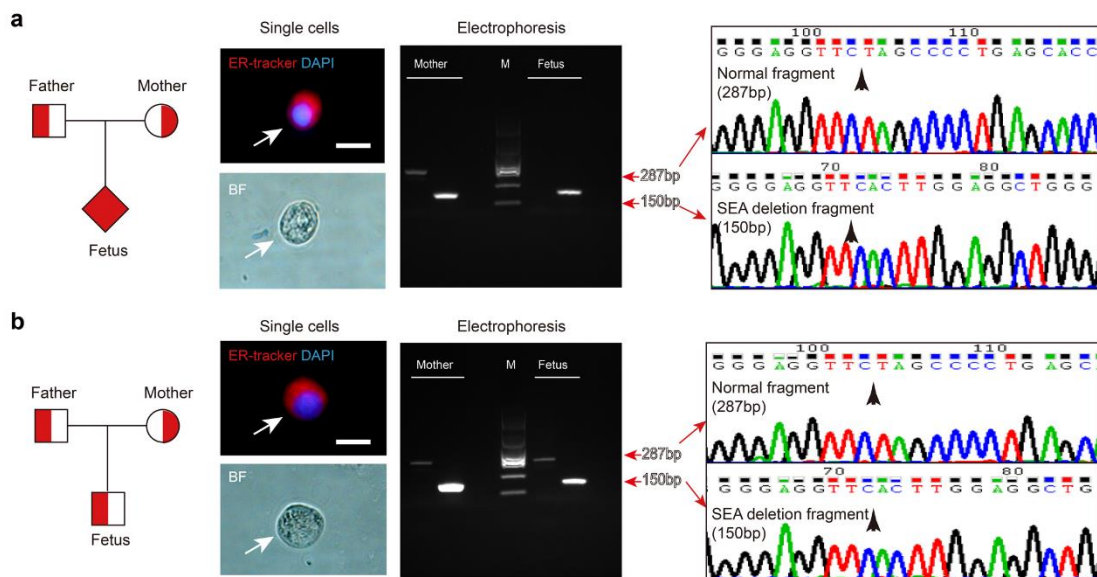

**Figure S7.** Rare fetal trophoblastic cells for diagnosis of SEA  $\alpha$ -thalassemia. Another two cases (not shown in Figure 3) whose fetuses are at risk for  $--^{SEA}/$  thalassemia are shown. a) The white arrow indicates the single cells isolated from P5. Photograph of agarose gel shows the  $--^{SEA}/$  deletion detected by Gap-PCR assay. The deletion breakpoint of  $--^{SEA}/$  mutation can be found by Sanger sequencing. b) The white arrow indicates the single cells isolated from P1. Photograph shows the  $--^{SEA}/$  deletion detected by Gap-PCR assay. The deletion breakpoint of  $--^{SEA}/$  mutation can be found by Sanger sequencing. Scale bar: 20  $\mu$ m. Fully symbols indicate affected members who carry homozygous mutation. Half-filled symbols indicate members who carry heterozygous mutation. Squares indicate males, circles indicate females, and diamonds indicate individuals of unknown gender.

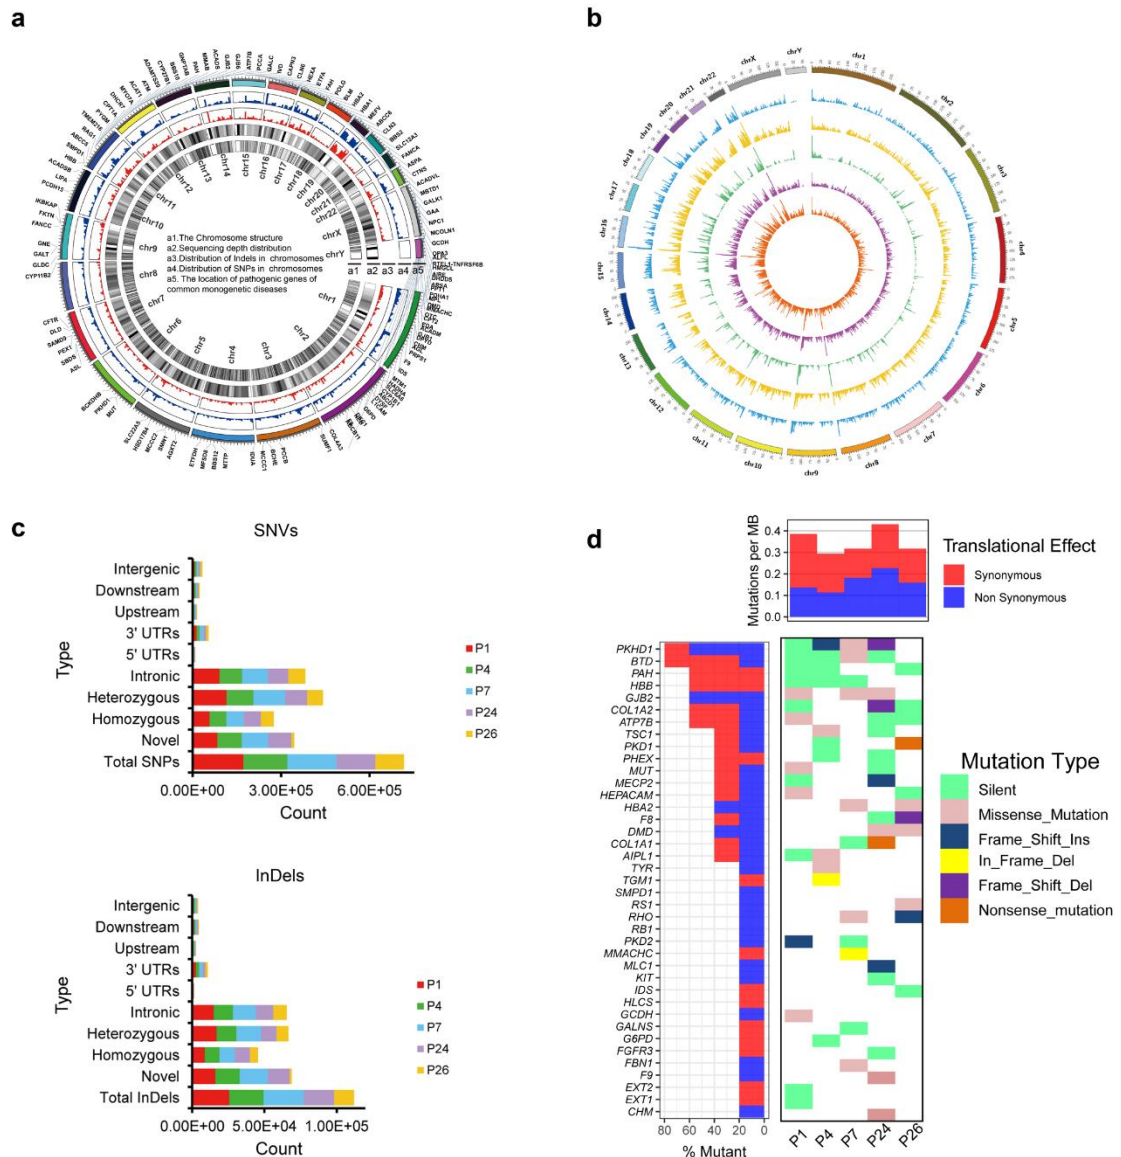

**Figure S8.** Whole exome sequencing for WGA products amplified from rare trophoblastic cells. a) Information on the whole exome sequencing for patient P1. The inner to outer circles represent the chromosomal structure, sequence depth, InDel distribution, SNP distribution and pathogenic genes of common monogenic diseases. b) Copy number profiles of five samples measured by WES. The inner to outer circles represent P7, P4, P26, P24 and P1. c) The total number and classification of variations. d) The variant profile for the 39 most common monogenic disease-associated genes.



The pathogenicity of these variants needs to be investigated further.

**Table S1.** Clinicopathological characteristics of 60 pregnant subjects.

| Subjects | Age<br>(years) | Gestational<br>age(weeks) | Gravidity | Parity | Single cells | Diagnosis           | Analysis by                |
|----------|----------------|---------------------------|-----------|--------|--------------|---------------------|----------------------------|
| P1       | 29             | 22 <sup>+1</sup>          | 3         | 0      | 5            | Thalassemia carrier | WGA                        |
| P2       | 25             | 23 <sup>+6</sup>          | 2         | 0      | 18           | Thalassemia carrier | WGA,<br>Immunofluorescence |
| P3       | 32             | 32 <sup>+5</sup>          | 2         | 1      | 2            | Normal pregnancy    | WGA                        |
| P4       | 31             | 4 <sup>+4</sup>           | 0         | 0      | 6            | Normal pregnancy    | WGA                        |
| P5       | 30             | 29 <sup>+2</sup>          | 2         | 0      | 5            | Thalassemia carrier | WGA                        |
| P6       | 30             | 16 <sup>+5</sup>          | 3         | 1      | 3            | Thalassemia carrier | WGA                        |
| P7       | 28             | 16 <sup>+1</sup>          | 1         | 0      | 4            | Normal pregnancy    | WGA                        |
| P8       | 36             | 17 <sup>+1</sup>          | 3         | 1      | 7            | Normal pregnancy    | WGA                        |
| P9       | 29             | 26 <sup>+3</sup>          | 4         | 0      | 7            | Normal pregnancy    | FISH,WGA                   |
| P10      | 35             | 22 <sup>+4</sup>          | 2         | 1      | 17           | Normal pregnancy    | WGA<br>Immunofluorescence  |
| P11      | 30             | 19                        | 2         | 0      | 5            | Thalassemia carrier | WGA                        |
| P12      | 31             | 13 <sup>+6</sup>          | 2         | 1      | 18           | Normal pregnancy    | WGA,<br>Immunofluorescence |
| P13      | 26             | 18                        | 1         | 0      | 15           | Normal pregnancy    | WGA,<br>Immunofluorescence |
| P14      | 31             | 16 <sup>+2</sup>          | 2         | 1      | 15           | Thalassemia carrier | WGA,<br>Immunofluorescence |
| P15      | 34             | 22 <sup>+1</sup>          | 6         | 3      | 3            | Normal pregnancy    | WGA                        |
| P16      | 25             | 19                        | 1         | 0      | 3            | Normal pregnancy    | WGA                        |
| P17      | 32             | 16 <sup>+1</sup>          | 3         | 2      | 4            | Normal pregnancy    | WGA                        |
| P18      | 19             | 13 <sup>+6</sup>          | 1         | 0      | 5            | Thalassemia carrier | WGA                        |
| P19      | 29             | 21 <sup>+3</sup>          | 2         | 1      | 2            | Normal pregnancy    | WGA                        |
| P20      | 37             | 18                        | 5         | 1      | 8            | Normal pregnancy    | FISH,WGA                   |
| P21      | 18             | 21                        | 1         | 0      | 5            | Normal pregnancy    | FISH,WGA                   |
| P22      | 27             | 7 <sup>+2</sup>           | 1         | 0      | 3            | Normal pregnancy    | WGA                        |
| P23      | 32             | 17 <sup>+6</sup>          | 4         | 1      | 3            | Normal pregnancy    | WGA                        |
| P24      | 33             | 15 <sup>+2</sup>          | 5         | 2      | 4            | Normal pregnancy    | WGA                        |
| P25      | 32             | 14 <sup>+2</sup>          | 2         | 1      | 15           | Thalassemia carrier | WGA,<br>Immunofluorescence |
| P26      | 28             | 24 <sup>+1</sup>          | 1         | 0      | 19           | Normal pregnancy    | WGA,<br>Immunofluorescence |
| P27      | 32             | 18                        | 5         | 2      | 6            | Normal pregnancy    | FISH,WGA                   |

## WILEY-VCH

|     |    |                  |                  |                  |    |                     |                |
|-----|----|------------------|------------------|------------------|----|---------------------|----------------|
| P28 | 26 | 13 <sup>+2</sup> | 2                | 1                | 6  | Normal pregnancy    | WGA            |
| P29 | 36 | 12 <sup>+6</sup> | 3                | 0                | 5  | Normal pregnancy    | WGA            |
| P30 | 25 | 32 <sup>+6</sup> | 2                | 0                | 4  | Thalassemia carrier | WGA            |
| P31 | 27 | 13               | 1                | 0                | 7  | Normal pregnancy    | FISH,WGA       |
| P32 | 26 | 38 <sup>+2</sup> | 2                | 0                | 3  | Normal pregnancy    | WGA            |
| P33 | 27 | 17               | 1                | 0                | 4  | Normal pregnancy    | WGA            |
| P34 | 28 | 16 <sup>+4</sup> | 2                | 1                | 5  | Normal pregnancy    | WGA            |
| P35 | 29 | 21 <sup>+2</sup> | 1                | 0                | 5  | Normal pregnancy    | FISH, WGA      |
| P36 | 26 | 14 <sup>+2</sup> | 2                | 0                | 5  | Normal pregnancy    | WGA            |
| P37 | 24 | 20 <sup>+5</sup> | 1                | 0                | 5  | Normal pregnancy    | FISH, WGA      |
| P38 | 21 | 13 <sup>+2</sup> | 2                | 0                | 5  | Normal pregnancy    | WGA            |
| P39 | 31 | 16 <sup>+2</sup> | 4                | 1                | 5  | Normal pregnancy    | WGA            |
| P40 | 26 | 13 <sup>+1</sup> | 1                | 0                | 3  | Normal pregnancy    | WGA            |
| P41 | 30 | 16 <sup>+4</sup> | 1                | 0                | 54 | Normal pregnancy    | Flow cytometry |
| P42 | 29 | 6 <sup>+6</sup>  | 2                | 1                | 69 | Normal pregnancy    | Flow cytometry |
| P43 | 36 | 15 <sup>+4</sup> | 3                | 2                | 30 | Normal pregnancy    | Flow cytometry |
| P44 | 26 | 19 <sup>+3</sup> | NA <sup>a)</sup> | NA <sup>a)</sup> | 79 | Normal pregnancy    | Flow cytometry |
| P45 | 29 | 36 <sup>+2</sup> | 2                | 0                | 2  | Normal pregnancy    | WGA,           |
| P46 | 23 | 10 <sup>+2</sup> | 4                | 2                | -  | Normal pregnancy    | β-hCG staining |
| P47 | 24 | 20 <sup>+5</sup> | 1                | 0                | -  | Normal pregnancy    | β-hCG staining |
| P48 | 26 | 18 <sup>+6</sup> | 1                | 0                | -  | Normal pregnancy    | β-hCG staining |
| P49 | 24 | 16               | NA <sup>a)</sup> | NA <sup>a)</sup> | 4  | Normal pregnancy    | WGA            |
| P50 | 17 | 10               | 1                | 0                | 4  | Thalassemia carrier | WGA            |
| P51 | 31 | 20 <sup>+1</sup> | 2                | 1                | 5  | Normal pregnancy    | WGA            |
| P52 | 23 | 11 <sup>+1</sup> | 3                | 0                | 5  | Normal pregnancy    | WGA            |
| P53 | 34 | 24 <sup>+4</sup> | 1                | 0                | 5  | Normal pregnancy    | WGA            |
| P54 | 27 | 17 <sup>+5</sup> | 1                | 0                | 5  | Thalassemia carrier | WGA            |
| P55 | 33 | 23 <sup>+3</sup> | 3                | 1                | 7  | Normal pregnancy    | WGA            |
| P56 | 27 | 30               | 1                | 0                | 4  | Normal pregnancy    | WGA            |
| P57 | 29 | 20 <sup>+2</sup> | 1                | 0                | 7  | Normal pregnancy    | WGA            |
| P58 | 27 | 17 <sup>+2</sup> | 2                | 1                | 4  | Thalassemia carrier | WGA            |
| P59 | 29 | 32               | 3                | 1                | 4  | Thalassemia carrier | WGA            |
| P60 | 27 | 16               | 1                | 0                | 7  | Normal pregnancy    | WGA            |

<sup>a)</sup>NA, Not available

**Table S2.** STR results of candidate trophoblastic cells isolated from Pap samples.

| Patient | Age | Gestational<br>age<br>(weeks) | Single<br>cells | STR           |                 |                     |                  |
|---------|-----|-------------------------------|-----------------|---------------|-----------------|---------------------|------------------|
|         |     |                               |                 | Total<br>loci | Covered<br>loci | Informative<br>loci | Mismatch<br>loci |
| P1      | 29  | 22                            | 5               | 19            | 19              | 9                   | 0                |
| P3      | 32  | 32                            | 2               | 19            | 19              | 0                   | 0                |
| P4      | 31  | 4                             | 6               | 19            | 17              | 10                  | 1                |
| P6      | 30  | 16                            | 3               | 19            | 7               | 2                   | 1                |
| P7      | 28  | 16                            | 4               | 19            | 16              | 10                  | 0                |
| P8      | 36  | 17                            | 6               | 19            | 12              | 11                  | 0                |
| P9      | 29  | 26                            | 4               | 19            | 12              | 9                   | 0                |
| P10     | 35  | 22                            | 5               | 19            | 16              | 4                   | 3                |
| P11     | 30  | 19                            | 5               | 19            | 10              | 4                   | 1                |
| P12     | 31  | 13                            | 6               | 19            | 17              | 12                  | 1                |
| P15     | 34  | 22                            | 3               | 19            | 18              | 0                   | 0                |
| P16     | 25  | 19                            | 3               | 19            | 7               | 6                   | 0                |
| P17     | 32  | 16                            | 4               | 19            | 10              | 7                   | 0                |
| P18     | 19  | 13                            | 5               | 19            | 13              | 6                   | 1                |
| P19     | 29  | 21                            | 2               | 19            | 5               | 2                   | 0                |
| P20     | 37  | 18                            | 5               | 19            | 6               | 4                   | 0                |
| P21     | 18  | 21                            | 3               | 19            | 10              | 6                   | 0                |
| P22     | 27  | 7                             | 3               | 19            | 7               | 4                   | 0                |
| P23     | 32  | 17                            | 3               | 19            | 11              | 2                   | 0                |
| P24     | 33  | 15                            | 4               | 19            | 13              | 11                  | 0                |
| P26     | 28  | 24                            | 7               | 19            | 16              | 8                   | 1                |
| P27     | 32  | 18                            | 3               | 19            | 10              | 8                   | 0                |
| P28     | 26  | 13                            | 6               | 19            | 16              | 7                   | 5                |
| P29     | 36  | 12                            | 5               | 19            | 6               | 4                   | 1                |
| P33     | 27  | 17                            | 5               | 19            | 4               | 3                   | 0                |
| P40     | 26  | 13                            | 5               | 19            | 5               | 4                   | 0                |
| P49     | 24  | 16                            | 4               | 19            | 4               | 4                   | 0                |
| P50     | 17  | 10                            | 4               | 19            | 8               | 3                   | 0                |
| P51     | 31  | 20                            | 5               | 19            | 5               | 1                   | 0                |
| P52     | 23  | 11                            | 5               | 19            | 7               | 2                   | 1                |
| P53     | 34  | 24                            | 5               | 19            | 6               | 3                   | 0                |
| P55     | 33  | 23                            | 7               | 19            | 4               | 2                   | 0                |

**Table S3.** Primers used in the detection of *SRY* and diagnosis of thalassemia

| For                            | Primer Name              | Sequence (5'-3')           | Size  | Annealing temperature(°C) |
|--------------------------------|--------------------------|----------------------------|-------|---------------------------|
| Detection<br>of <i>SRY</i>     | ACTB                     | F TGGCACCACACCTTCTACAA     | 116bp | 62                        |
|                                |                          | R CCACTCACCTGGGTCATCTT     |       |                           |
|                                | SRY                      | F CCACTTACCGCCCATCAAC      | 104bp | 60                        |
|                                |                          | R AGGTCTTTGTAGCCAATGTTACCC |       |                           |
| Diagnosis<br>of<br>thalassemia | HBB1                     | F AGAAGAGCCAAGGACAGGTACG   | 353bp | 61                        |
|                                |                          | R CTCTGTCTCCACATGCCAGTT    |       |                           |
|                                | HBB2                     | F TCTGATAGGCACTGACTCTCTCTG | 309bp | 60                        |
|                                |                          | R GGGGAAAGAAAACATCAAGCG    |       |                           |
|                                | HBB3                     | F CATGCCTCTTTGCACCATTCTAA  | 568bp | 60                        |
|                                |                          | R TGACCTCCCACATTCCCTTTTTAG |       |                           |
|                                | SEA-normal               | F GTGTTCTCAGTATTGGAGGGAA   | 287bp | 58                        |
|                                |                          | R GACACGCTTCCAATACGCTTA    |       |                           |
| SEA-<br>deletion               | F GTGTTCTCAGTATTGGAGGGAA | 194bp                      | 58    |                           |
|                                | R CTTACTGCAGCCTTGA ACTCC |                            |       |                           |
